# Supplementary material for: Synthesis of a phthalocyanine 2D covalent organic framework
Source: Royal Society of Chemistry journal article supplement (doi:10.1039/c3ce41091a), 2013-01-01
Supplement: c3ce41091a.pdf [file c3ce41091a.pdf]

## Supplementary Information

### Synthesis of a Phthalocyanine 2D Covalent Organic Framework

Venkata S. Pavan K. Neti,<sup>a</sup> Xiaofei Wu,<sup>b</sup> Mahsa Hosseini,<sup>a</sup> Shuguang Deng,<sup>b</sup> and Luis Echegoyen\*<sup>a</sup>

<sup>a</sup> Department of Chemistry, University of Texas at El Paso, El Paso, TX 79968, United States

<sup>b</sup> Department of Chemical Engineering, New Mexico State University, Las Cruces, NM 88003, United States

<sup>a</sup> E-mail: echegoyen@utep.edu, Tel/Fax: +1 (915) 747-7573/(915) 747-8807

#### Contents

**Section A. Materials and methods**

**Section B. Synthetic procedures**

**Section C. FT-IR spectral profiles**

**Section D. Solid-state <sup>13</sup>C CP MAS NMR spectrum of CoPc-BPDA COF**

**Section E. X-ray fluorescence spectroscopy**

**Section F: Thermogravimetric Analysis**

**Section G: Simulation and Modeling**

**Section H. Surface Area Measurements**

**Section I: Cryo Electron Microscope Images**

**Section J. Supporting reference**

## Section A. Materials and methods:

All chemicals and solvents were purchased from Sigma-Aldrich except dibromoveratrole (Alfa Aesar). Co octahydroxy phthalocyanine<sup>1,2</sup> was prepared according to literature procedures.

<sup>1</sup>H NMR spectra were recorded on JEOL 600MHz spectrometer, where chemical shifts ( $\delta$  in ppm) were determined with a residual proton of the solvent as standard. Fourier transform Infrared (FT-IR) spectra were recorded on a Perkin-Elmer Spectrum one infrared spectrometer (ATR). Matrix-assisted laser desorption ionization time-of-flight mass (MALDI-TOF MS) spectra were recorded on Bruker benchtop microflex model using matrix trihydroxyanthracene. Field-emission scanning electron microscopy (FE-SEM) was performed on a Hitachi S-4800 fitted with an EDAX energy-dispersive spectrometry system by adhering sample on a sampling platform. Transmission electron microscopy (TEM) images were obtained on a Hitachi H-9500 model. Samples were prepared by drop-casting an acetone suspension of CoPc-BPDA COF onto a copper grid. Powder X-ray diffraction (PXRD) data were recorded on a Bruker DiscoverD8 model diffractometer by depositing powder on plastic substrate, from  $2\theta = 1^\circ$  up to  $30^\circ$  with  $0.05^\circ$  increment. In order to determine pore textural properties including the specific Brunauer–Emmet–Teller (BET) surface area, pore volume and pore size distribution, nitrogen adsorption and desorption isotherm on CoPc-BPDA COF sample at 77 K were measured in an ASAP-2020 adsorption apparatus (Micromeritics). The as-synthesized samples were degassed in situ at  $165^\circ\text{C}$  with a heating rate of  $3^\circ\text{C}/\text{min}$  under a vacuum ( $0.0001\text{ mmHg}$ ) for 12 h before nitrogen adsorption measurements in order to ensure the micro-channels in the structure were guest-free. The Brunauer-Emmett-Teller (BET) method was utilized to calculate the specific surface areas by using the non-local density functional theory (NLDFT) model, the pore volume was derived from the sorption curve. Thermogravimetric analysis from  $30$ – $900^\circ\text{C}$  was carried out on a Mettler-Toledo thermogravimetric analyzer in an  $\text{N}_2$  atmosphere using a  $3^\circ\text{C}/\text{min}$  ramp time.

## Section B. Synthetic Procedure:

### Synthesis of 2,3,9,10,16,17,23,24-Octamethoxyphthalocyaninato)cobalt(II) (MeO)<sub>8</sub>PcCo

(Octamethoxyphthalocyaninato)cobalt(II) was prepared using a literature procedure.<sup>1,2</sup>

(MeO)<sub>8</sub>PcCo obtained as a green solid in 40% yield. MALDI-TOF MS for C<sub>40</sub>H<sub>32</sub>N<sub>8</sub>O<sub>8</sub>Co (Calculated 811.17), found  $m/z$  = 811.87 [M]<sup>+</sup>.

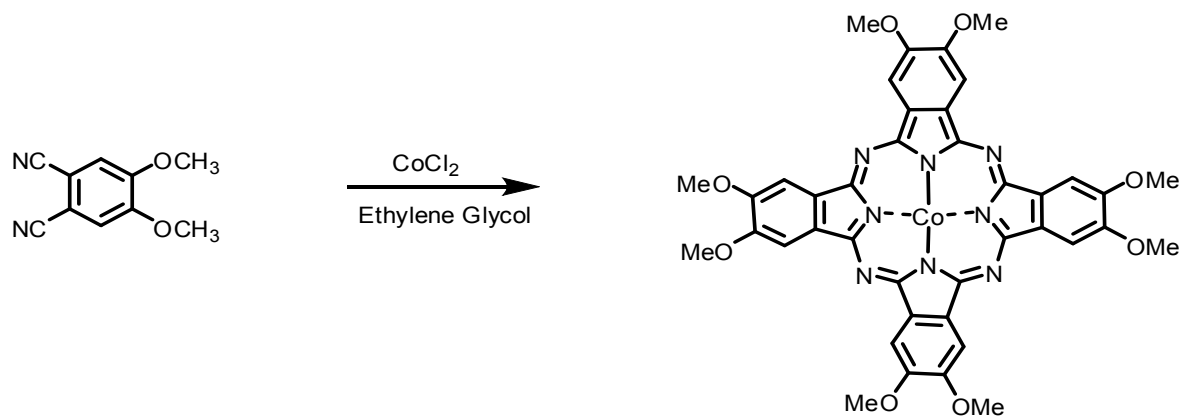

### Synthesis of 2,3,9,10,16,17,23,24-Octahydroxyphthalocyaninato)cobalt(II) (OH)<sub>8</sub>PcCo

(Octahydroxyphthalocyaninato) cobalt(II) was prepared using a literature procedure.<sup>1,2</sup>

(OH)<sub>8</sub>PcCo obtained as a dark green solid in 67% yield. MALDI-TOF MS for C<sub>32</sub>H<sub>16</sub>N<sub>8</sub>O<sub>8</sub>Co (Calculated 699.04), found  $m/z$  = 698.99 [M]<sup>+</sup>.

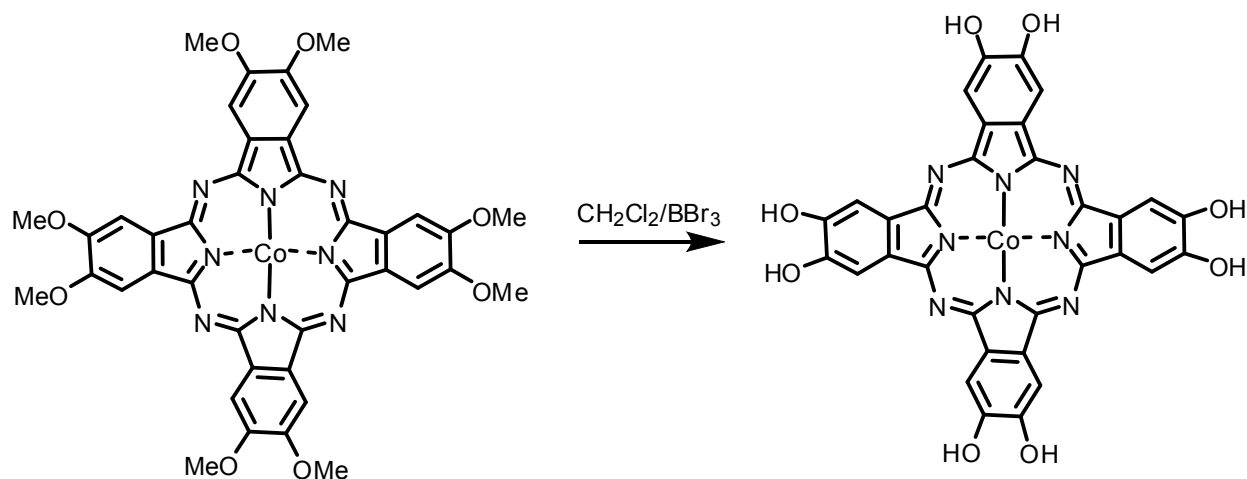

**CoPc-BPDA COF.** 4, 4'-Biphenyldiboronic acid (BPDA, 14.51mg, 0.06 mmol) and (OH)<sub>8</sub>PcCo (21 mg, 0.03 mmol) were sonicated in a mixture of DMAC/*o*-dichlorobenzene (2/1 in vol.; 2 mL) in a glass vial, then the mixture was transferred into a glass ampoule. The ampoule was flash frozen in liquid N<sub>2</sub> bath and sealed off at the neck of the ampoule. The ampoule was placed in an oven at 120 °C for 74hrs. Then the mixture was filtered off, washed with anhydrous toluene and dried at 150 °C under vacuum for 12 h, to give a dark green powder in 80% isolation yield. Elemental analysis (%) calcd. for CoPc- BPDA COF (C<sub>56</sub>H<sub>24</sub>B<sub>4</sub>N<sub>8</sub>O<sub>8</sub>Co)<sub>n</sub> Theory: C (64.74), H (2.33), N (10.78), found C (57.05), H (3.26), N (9.76) respectively. Elemental analysis of boronate COFs generally give lowered carbon values from the formation of non-combustible boron carbide byproducts. The presence of boron was confirmed by a <sup>11</sup>B MAS NMR spectroscopy.

### Section C. FT-IR spectral profiles

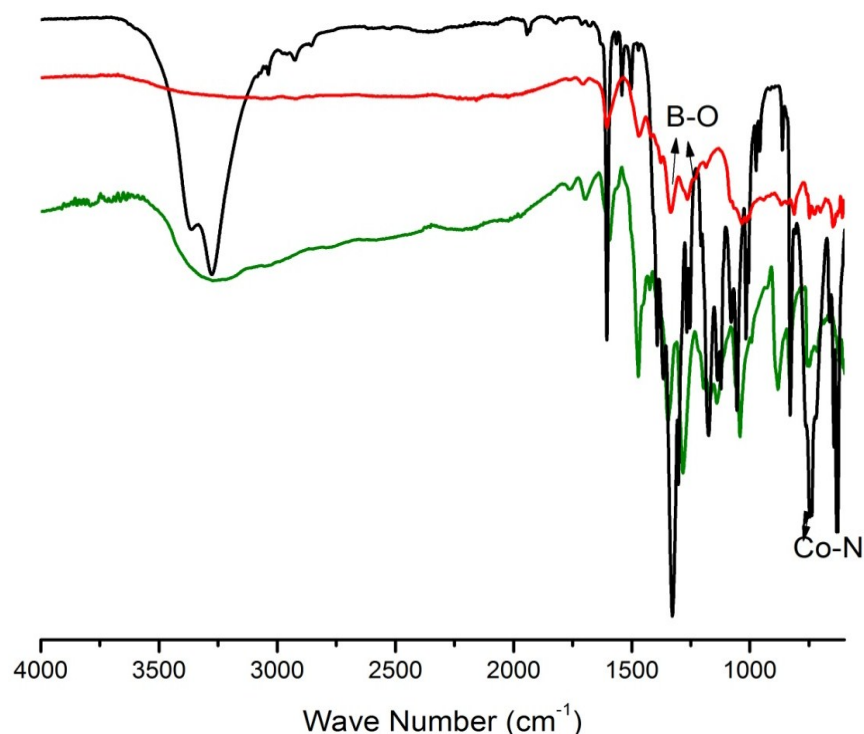

**Figure S1.** IR spectra of 4, 4'-Biphenyldiboronic acid (black curve), (OH)<sub>8</sub>PcCo (green curve) and CoPc-BPDA COF (red curve).

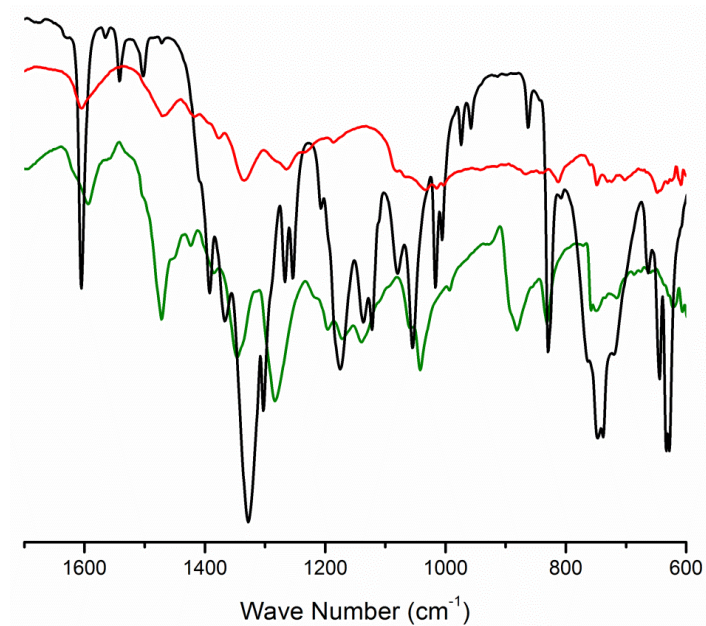

**Figure S2.** Expansion of 600-1700  $\text{cm}^{-1}$  region of the above spectrum.

**Section D. Solid-state  $^{13}\text{C}$  CP-MAS NMR spectrum of CoPc-BPDA COF**

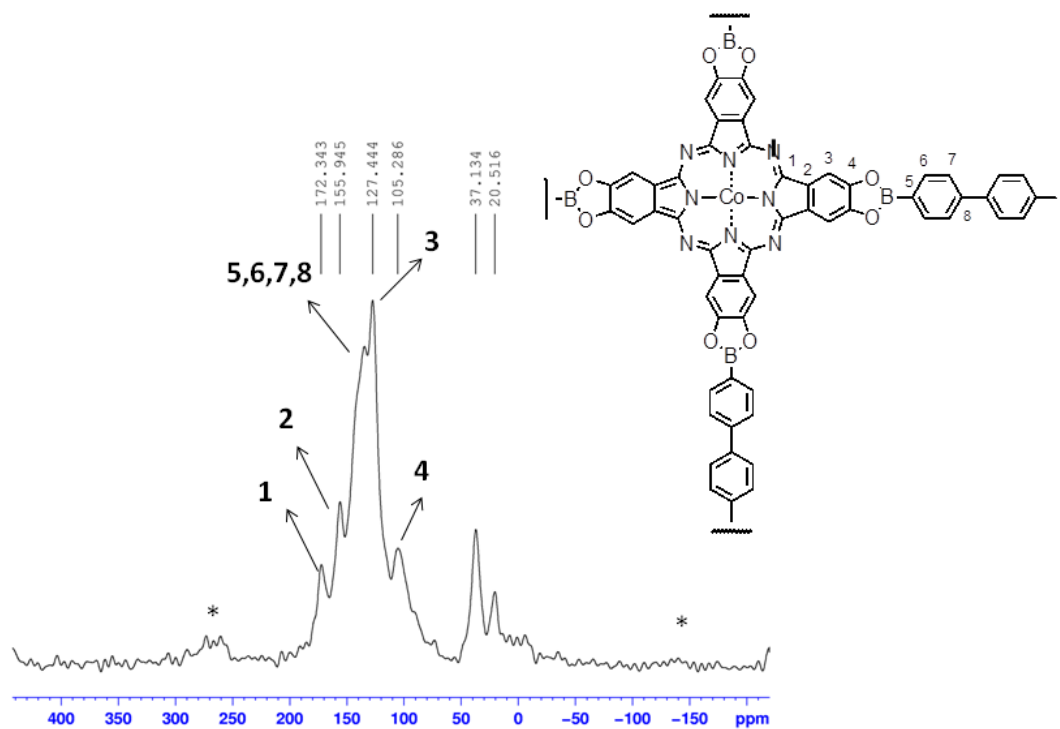

**Figure S3.** Solid state  $^{13}\text{C}$  CP/MAS NMR spectra of CoPc-BPDA COF recorded at a MAS rate of 12.5 kHz. Signals with \* are side bands.

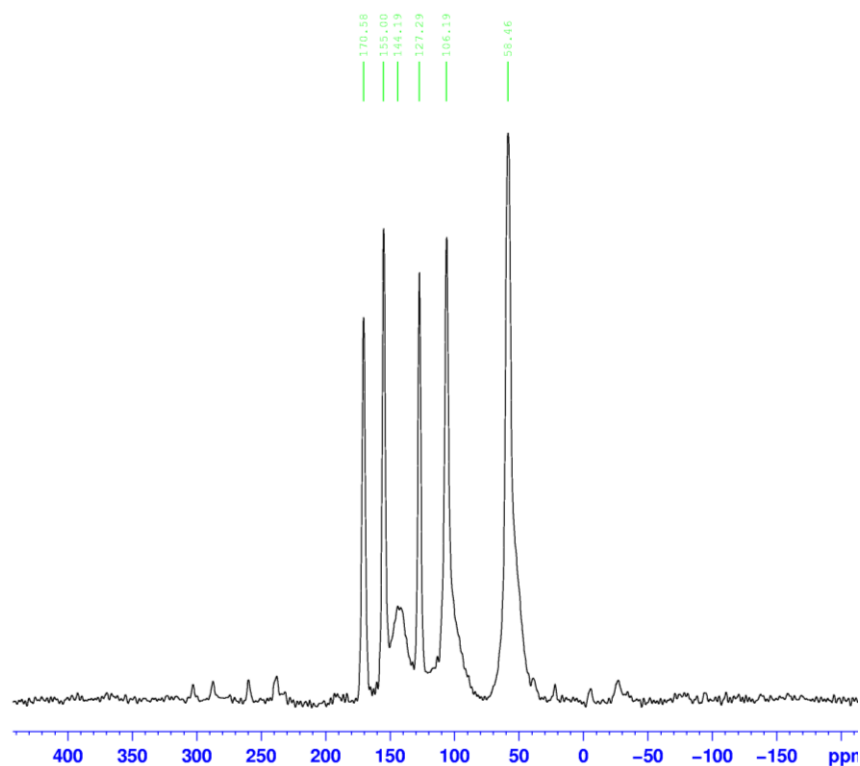

**Figure S4.** Solid state  $^{13}\text{C}$  CP/MAS NMR spectra of CoPc (OMe) $_8$  recorded at a MAS rate of 12.5 kHz. Signals with \* are side bands.

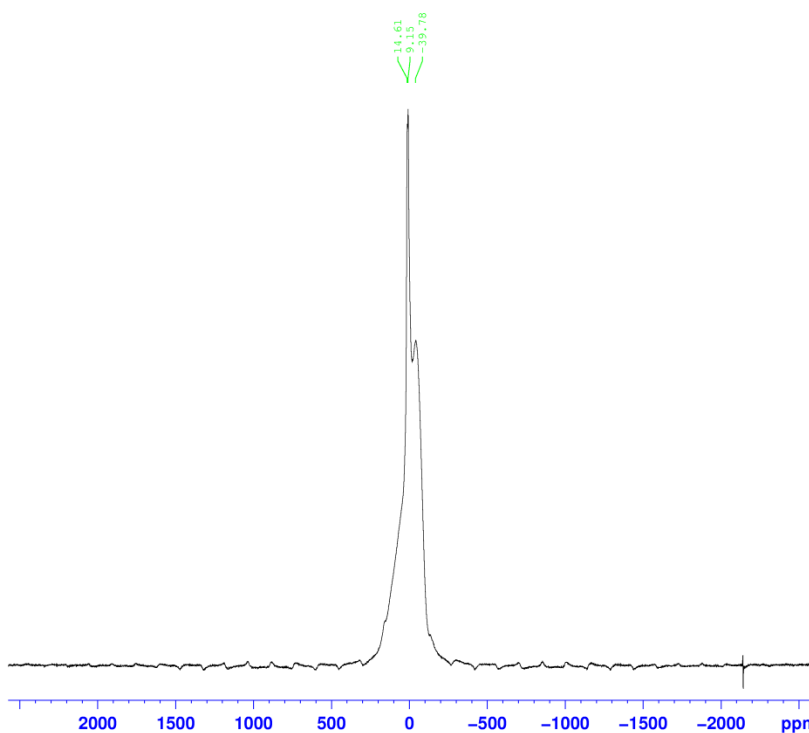

**Figure S5.** Solid state  $^{11}\text{B}$  MAS NMR spectra of CoPc-BPDA COF recorded at a MAS rate of 14 kHz.

## Section E. X-ray fluorescence spectroscopy

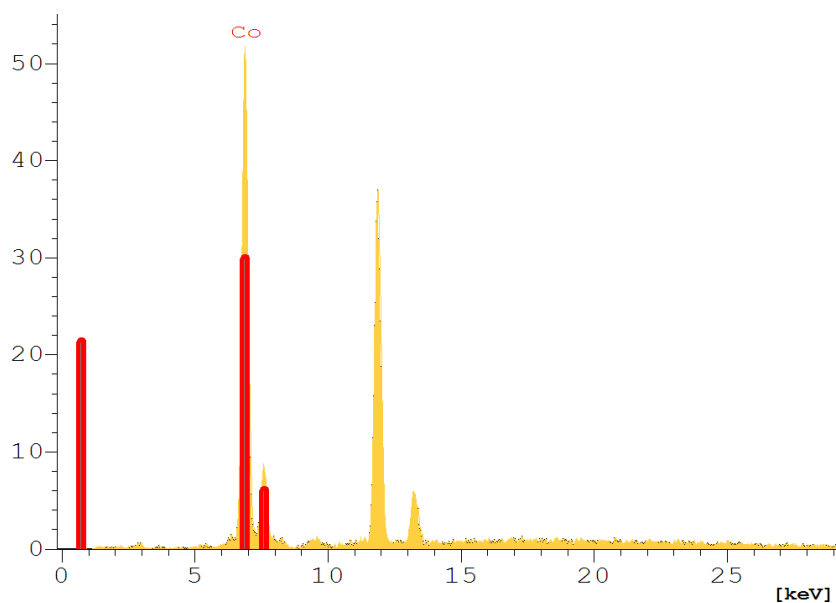

**Figure S6.** Presence of Cobalt within the framework of CoPc-BPDA COF

## Section F. Simulation and calculation of structure

Modeling of the CoPc-BPDA COF structure:

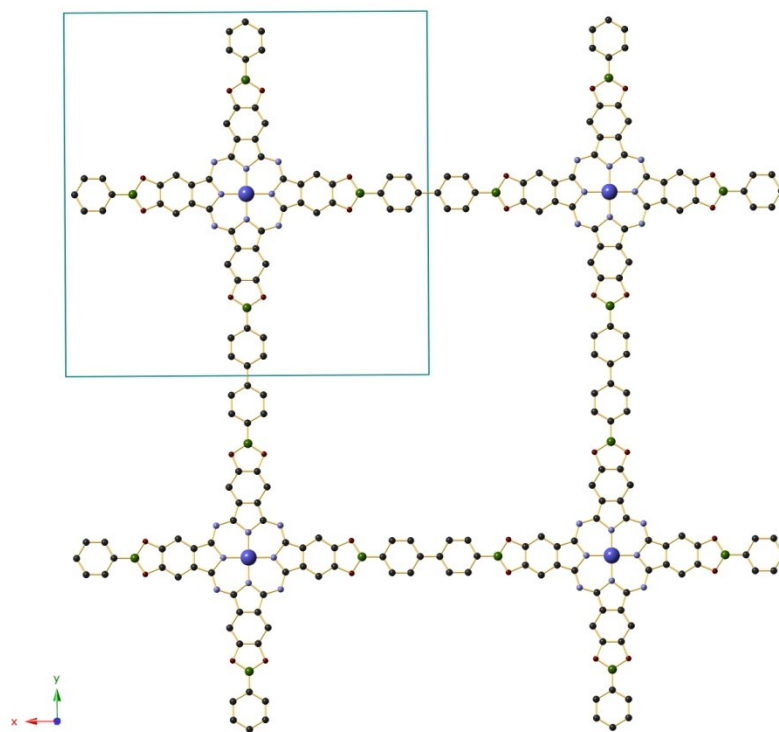

## Simulation & Refinement of the CoPc-PorDBA COF

Geometry optimization and Pawley refinement of the CoPc-BPDA COF was carried out with Accelrys MS Modeling 4.3 using Reflex module. The unit cell dimensions were calculated from the geometrical parameters from the optimized structure. Pawley refinement was performed to optimize the lattice parameters iteratively until the RWP value converges. After Pawley refinement the peak profile was refined using the Pseudo-Voigt peak shape function and whole profile fitting was done using Berrar - Baldinozzi function for asymmetry correction during the refinement processes. The final  $R_{WP}$  and  $R_p$  values were 10.69% and 16.39%, respectively. The unit cell parameters were first calculated and then refined from the experimentally observed peak positions, as a result we obtained cell parameters of  $a = b = 26.65 \text{ \AA}$  and  $c = 3.55 \text{ \AA}$ . Simulated PXRD patterns were calculated for an eclipsed arrangement of  $P4/mmm$  space group, where all atoms in an each layer of the framework lay over one another.

Refined unit cell parameters and fractional atomic coordinates for CoPc-PorDBA COF.

| CoPc-PorDBA COF   | $a$ (Å) | $c$ (Å) |
|-------------------|---------|---------|
| MS modeling       | 27.30   | 3.6235  |
| Pawley refinement | 26.65   | 3.55    |

|      | B | C       | Co      | N   | O      |
|------|---|---------|---------|-----|--------|
| C1   | 2 | 0.02713 | 0.5     | 0.5 | 0.25   |
| B2   | 1 | 0.18692 | 0.5     | 0.5 | 0.25   |
| N3   | 4 | 0.43026 | 0.5     | 0.5 | 0.25   |
| C4   | 2 | 0.13009 | 0.5     | 0.5 | 0.25   |
| C5   | 2 | 0.0533  | 0.45571 | 0.5 | 0.5    |
| C6   | 2 | 0.10447 | 0.45571 | 0.5 | 0.5    |
| C7   | 2 | 0.26281 | 0.47453 | 0.5 | 0.5    |
| C8   | 2 | 0.30645 | 0.44741 | 0.5 | 0.5    |
| C9   | 2 | 0.34987 | 0.47465 | 0.5 | 0.5    |
| C10  | 2 | 0.39788 | 0.45912 | 0.5 | 0.5    |
| O11  | 5 | 0.21603 | 0.45501 | 0.5 | 0.5    |
| N12  | 4 | 0.41198 | 0.41198 | 0.5 | 0.25   |
| Co13 | 3 | 0.5     | 0.5     | 0.5 | 0.0625 |



## Section G: Thermogravimetric Analysis

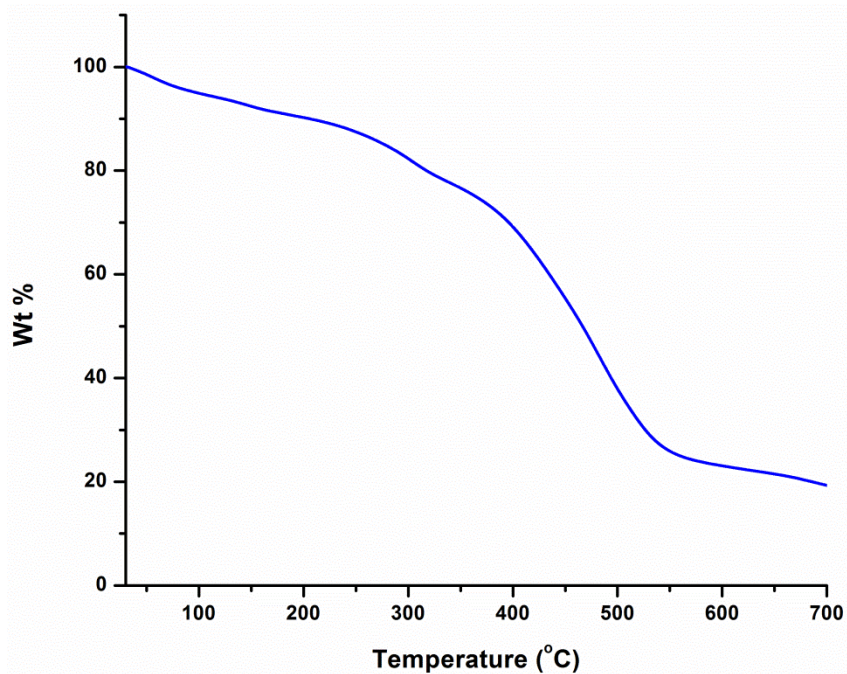

**Figure S7.** TGA of COF obtained up to 700°C using a linear 3 °C/min ramp method

## Section H: Surface Area measurements

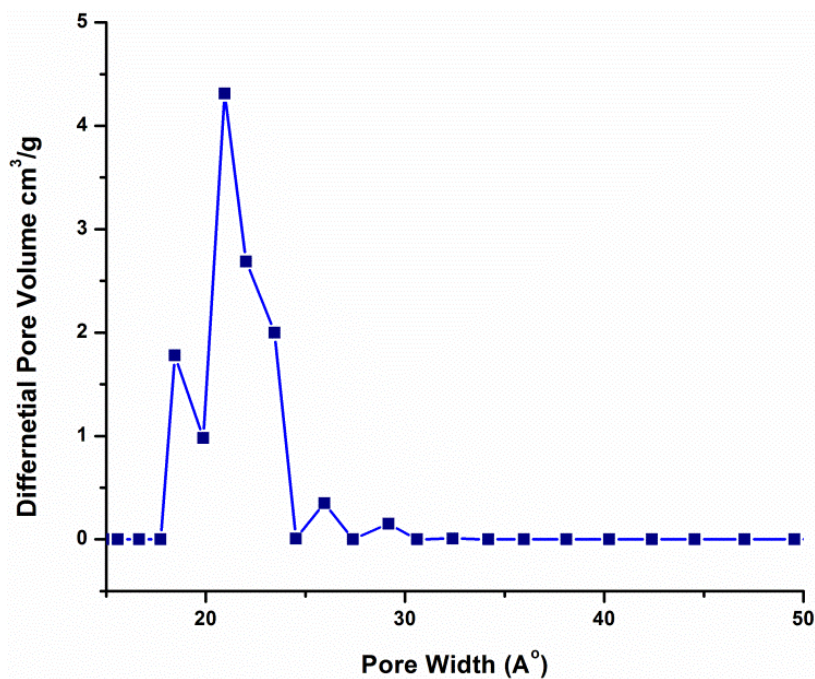

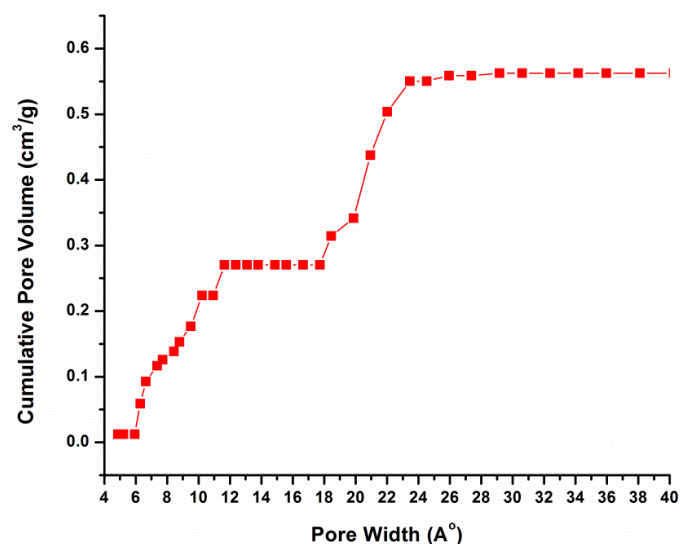

**Figure S8.** Differential (top) and cumulative (bottom) pore size distribution plot of CoPc-BPDA COF from the application of the NLDFT model to the N<sub>2</sub> isotherm.

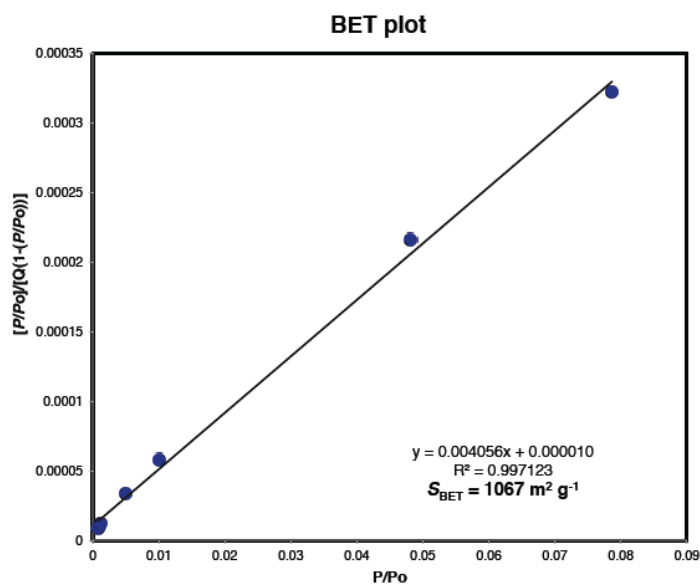

**Figure S9.** BET plot for CoPc-BPDA COF calculated from isotherm data.

### Calculation of isosteric heat of adsorption

The adsorption enthalpy at zero coverage was calculated from Henry constant using the Van't Hoff equation as

$$\ln K = -\frac{\Delta H}{RT} + \frac{\Delta S}{R}$$

K is Henry constant, T is temperature, plotting  $\ln K$  v.s.  $1000/T$

## Section I: Cryo Electron Microscope Images

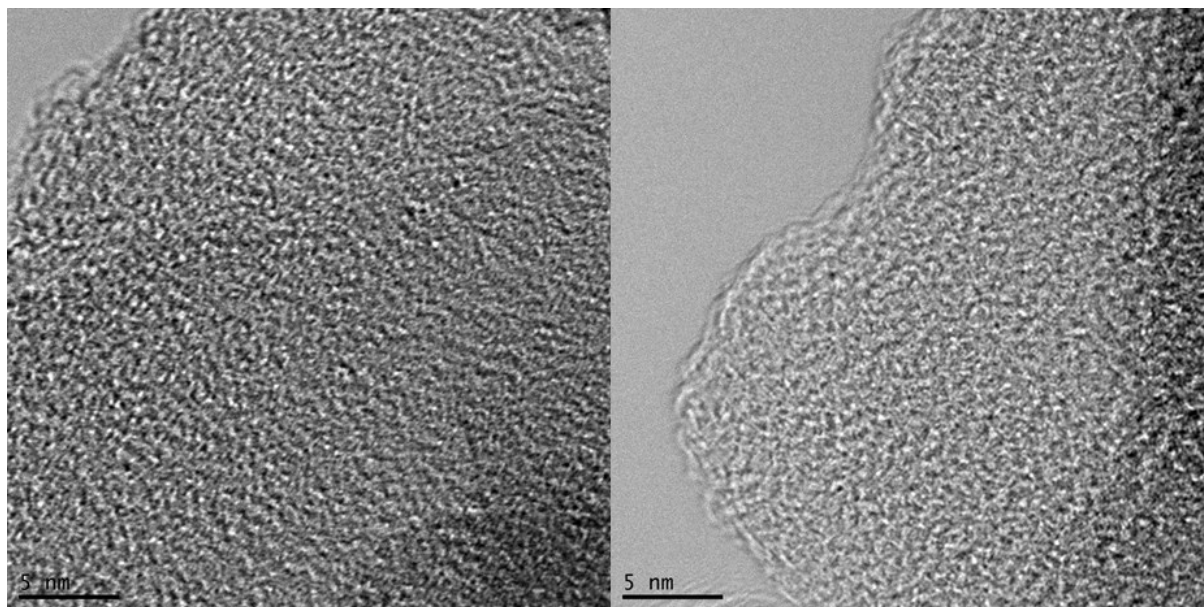

**Figure S10.** Cryo Electron Microscope Images of CoPc-BPDA COF.

## Section J. Supporting reference

- 1) J. Metz, O. Schneider, and M. Hanack, *Inorg. Chem.* **23**, 1065-1071 (1984).
- 2) X. Ding, X. Feng, A. Saeki, S. Seki, A. Nagai and D. Jiang, *Chem. Commun.*, 2012, **48**, 8952
